# Supplementary material
Source: PubMed Central journal article supplement (PMC2648899)

**Supplementary material to exact and efficient inference procedure  
for meta analysis and its application to the analysis of independent  
 $2 \times 2$  tables with all available data but without artificial continuity  
correction**

Lu Tian<sup>1</sup>, Tianxi Cai<sup>2</sup>, Marc A. Pfeffer<sup>3</sup>,  
Nikita Piankov<sup>4</sup>, Pierre-Yves Cremieux<sup>4,5</sup> and L. J. Wei<sup>2</sup>

<sup>1</sup> *Department of Preventive Medicine, Northwestern University, Chicago IL*

<sup>2</sup> *Department of Biostatistics, Harvard University, Boston, MA*

<sup>3</sup> *Cardiovascular Division, Brigham & Women's Hospital*

<sup>4</sup> *Analysis Group, Boston MA*

<sup>5</sup> *Department of Economics, University of Quebec at Montreal, Montreal, Quebec, Canada*

Table I. Number of Patients, Myocardial Infarctions (MI), and Cardiovascular death (Death) for 48 Rosiglitazone comparative studies.

| ID | Study         | Rosiglitazone Group |    |       | Control Group |    |       |
|----|---------------|---------------------|----|-------|---------------|----|-------|
|    |               | Patient             | MI | Death | Patient       | MI | Death |
| 1  | 49653/011     | 357                 | 2  | 1     | 176           | 0  | 0     |
| 2  | 49653/020     | 391                 | 2  | 0     | 207           | 1  | 0     |
| 3  | 49653/024     | 774                 | 1  | 0     | 185           | 1  | 0     |
| 4  | 49653/093     | 213                 | 0  | 0     | 109           | 1  | 0     |
| 5  | 49653/094     | 232                 | 1  | 1     | 116           | 0  | 0     |
| 6  | 100684        | 43                  | 0  | 0     | 47            | 1  | 0     |
| 7  | 49653/143     | 121                 | 1  | 0     | 124           | 0  | 0     |
| 8  | 49653/211     | 110                 | 5  | 3     | 114           | 2  | 2     |
| 9  | 49653/284     | 382                 | 1  | 0     | 384           | 0  | 0     |
| 10 | 712753/008    | 284                 | 1  | 0     | 135           | 0  | 0     |
| 11 | AVM100264     | 294                 | 0  | 2     | 302           | 1  | 1     |
| 12 | BRL49653C/185 | 563                 | 2  | 0     | 142           | 0  | 0     |
| 13 | BRL49653/334  | 278                 | 2  | 0     | 279           | 1  | 1     |
| 14 | BRL49653/347  | 418                 | 2  | 0     | 212           | 0  | 0     |
| 15 | 49653/015     | 395                 | 2  | 2     | 198           | 1  | 0     |
| 16 | 49653/079     | 203                 | 1  | 1     | 106           | 1  | 1     |
| 17 | 49653/080     | 104                 | 1  | 0     | 99            | 2  | 0     |
| 18 | 49653/082     | 212                 | 2  | 1     | 107           | 0  | 0     |
| 19 | 49653/085     | 138                 | 3  | 1     | 139           | 1  | 0     |
| 20 | 49653/095     | 196                 | 0  | 1     | 96            | 0  | 0     |
| 21 | 49653/097     | 122                 | 0  | 0     | 120           | 1  | 0     |
| 22 | 49653/125     | 175                 | 0  | 0     | 173           | 1  | 0     |
| 23 | 49653/127     | 56                  | 1  | 0     | 58            | 0  | 0     |
| 24 | 49653/128     | 39                  | 1  | 0     | 38            | 0  | 0     |
| 25 | 49653/134     | 561                 | 0  | 1     | 276           | 2  | 0     |
| 26 | 49653/135     | 116                 | 2  | 2     | 111           | 3  | 1     |
| 27 | 49653/136     | 148                 | 1  | 2     | 143           | 0  | 0     |
| 28 | 49653/145     | 231                 | 1  | 1     | 242           | 0  | 0     |
| 29 | 49653/147     | 89                  | 1  | 0     | 88            | 0  | 0     |
| 30 | 49653/162     | 168                 | 1  | 1     | 172           | 0  | 0     |
| 31 | 49653/234     | 116                 | 0  | 0     | 61            | 0  | 0     |
| 32 | 49653/330     | 1172                | 1  | 1     | 377           | 0  | 0     |
| 33 | 49653/331     | 706                 | 0  | 1     | 325           | 0  | 0     |
| 34 | 49653/137     | 204                 | 1  | 0     | 185           | 2  | 1     |
| 35 | SB-712753/002 | 288                 | 1  | 1     | 280           | 0  | 0     |
| 36 | SB-712753/003 | 254                 | 1  | 0     | 272           | 0  | 0     |
| 37 | SB-712753/007 | 314                 | 1  | 0     | 154           | 0  | 0     |
| 38 | SB-712753/009 | 162                 | 0  | 0     | 160           | 0  | 0     |
| 39 | 49653/132     | 442                 | 1  | 1     | 112           | 0  | 0     |
| 40 | AVA100193     | 394                 | 1  | 1     | 124           | 0  | 0     |
| 41 | DREAM         | 2635                | 15 | 12    | 2634          | 9  | 10    |
| 42 | ADOPT         | 1456                | 27 | 2     | 2895          | 41 | 5     |
| 43 | 49653/044*    | 101                 | 0  | 0     | 51            | 0  | 0     |
| 44 | 49653/096*    | 232                 | 0  | 0     | 115           | 0  | 0     |
| 45 | 49653/282*    | 70                  | 0  | 0     | 75            | 0  | 0     |
| 46 | 49653/369*    | 25                  | 0  | 0     | 24            | 0  | 0     |
| 47 | 49653/325*    | 196                 | 0  | 0     | 195           | 0  | 0     |
| 48 | 797620/004*   | 676                 | 0  | 0     | 225           | 0  | 0     |

\* : Not reported in Table 1 of Nissen and Wolski (2007)

**FIGURE I.** 95% confidence intervals of the log(odds ratio) for MI and CVD death (control is the reference group) with 48 studies listed in Table 1 (Small circles are the observed log(odds ratios))

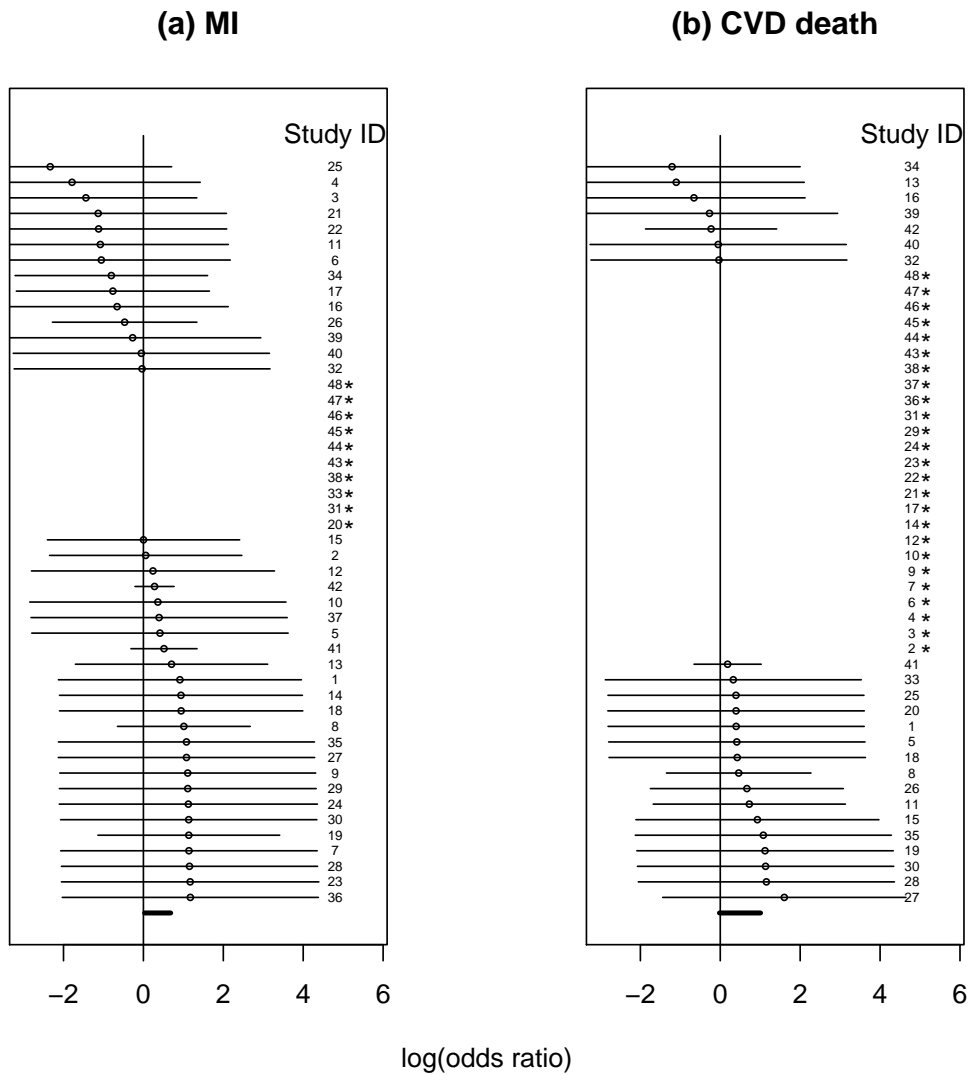

**FIGURE II.** 95% confidence intervals of the risk difference for MI (Rosiglitazone minus control) with 48 studies listed in Table 1 (Small circles are the observed risk differences)

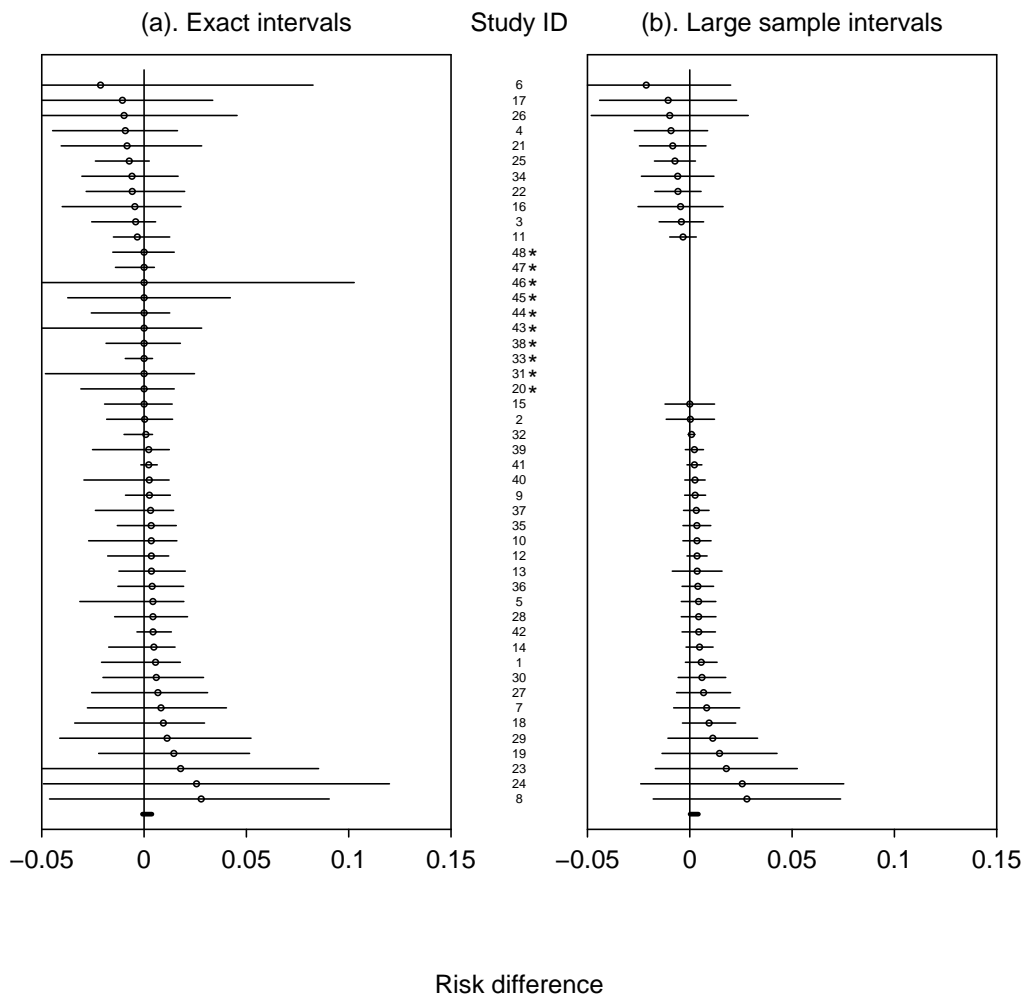

Supplement: kxn034_1.pdf [file kxn034_1.pdf]
